# Supplementary material
Source: Springer Nature journal article supplement (https://www.springermedizin.de/resource/supplementary/13069_2008_5_MOESM13_ESM.pdf/9659588)

## aetiology

Viral (HBV, HCV)  
Alcohol  
Metabolic  
Autoimmune  
Genetic

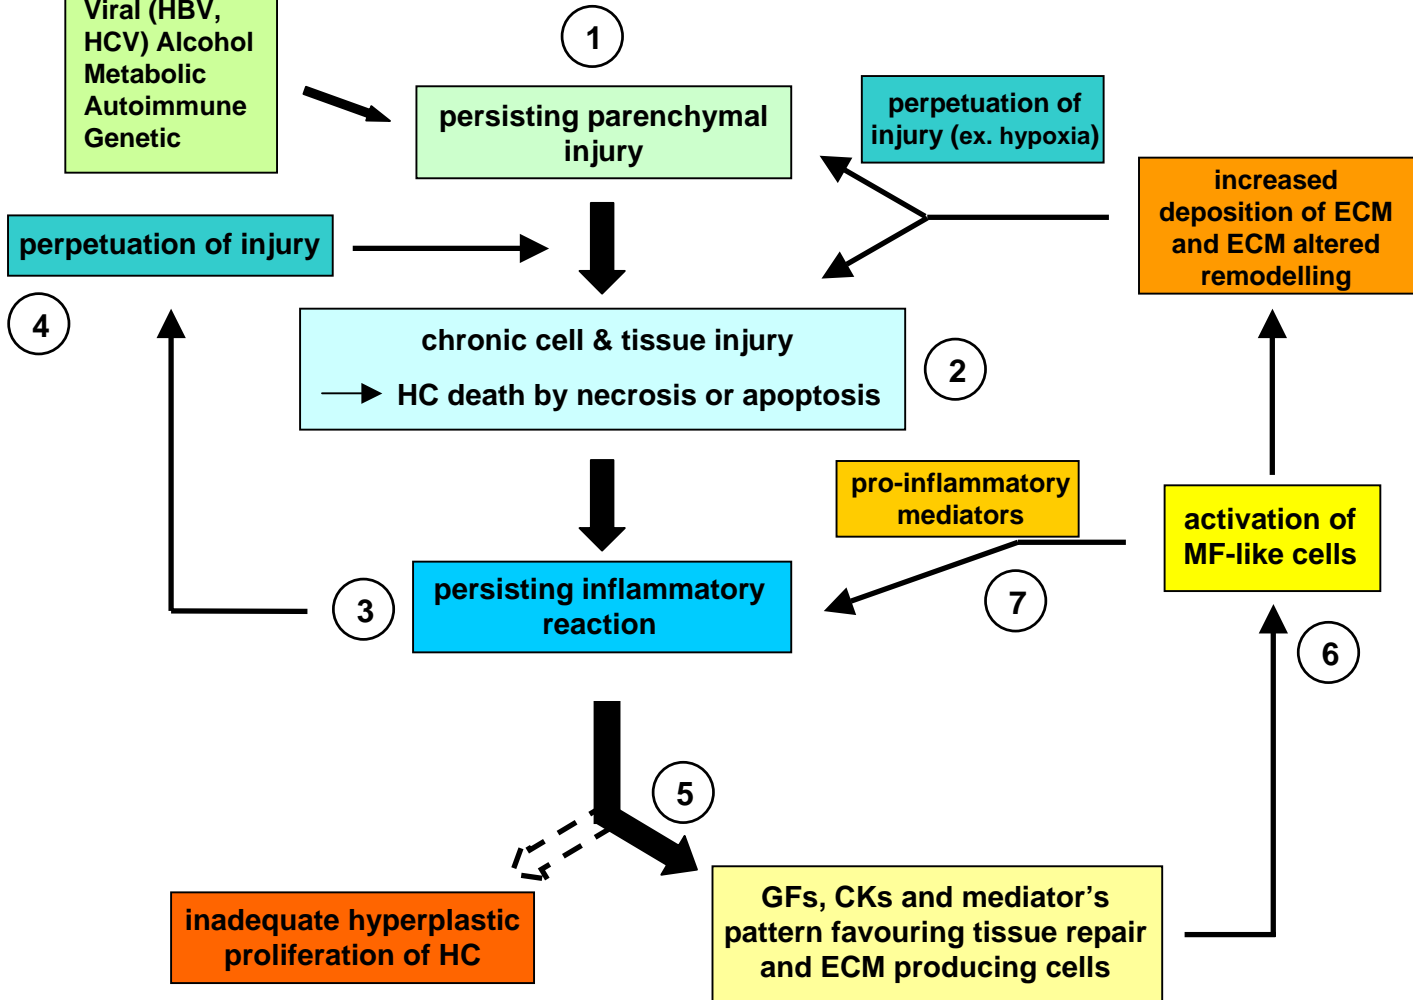

Supplement: MOESM13 [file 9659588]
